# Supplementary material for: The positive RNASEH1-AS1/has-miR-218-5p/NET1 feedback loop mediated by POU2F1 contributes to the development and progression of human lung squamous carcinoma
Source: Research Square preprint supplement (doi:10.21203/rs.3.rs-18125/v2), 2020-12-14

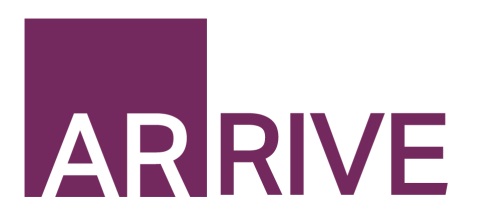


The ARRIVE Guidelines Checklist

Animal Research: Reporting In Vivo Experiments

Carol Kilkenny1, William J Browne2, Innes C Cuthill3, Michael Emerson4 and Douglas G Altman5

*1The National Centre for the Replacement, Refinement and Reduction of Animals in Research, London, UK, 2School of Veterinary Science, University of Bristol, Bristol, UK, 3School of Biological Sciences, University of Bristol, Bristol, UK, 4National Heart and Lung Institute, Imperial College London, UK, 5Centre for Statistics in Medicine, University of Oxford, Oxford, UK.*

|  | | ITEM | RECOMMENDATION | Section/ Paragraph |
| --- | --- | --- | --- | --- |
| 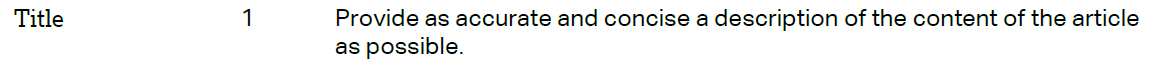 | | | Title, Page 1/ paragraph 1 |
| 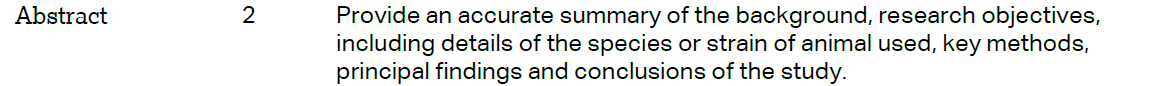 | | | Abstract, Page 2/ paragraph 1 |
| INTRODUCTION | | |  |
| 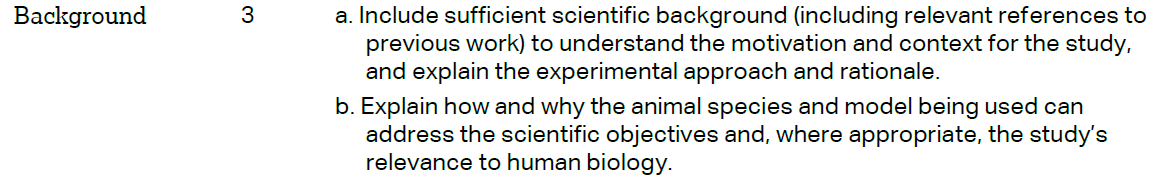 | | | Background, Page 4/ paragraph 2 |
| 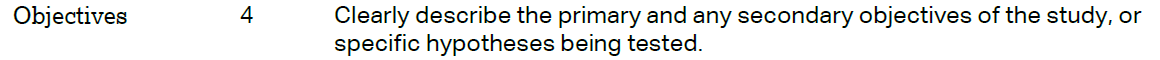 | | | Background, Page 4/ paragraph 2 |
| METHODS | | |  |
| 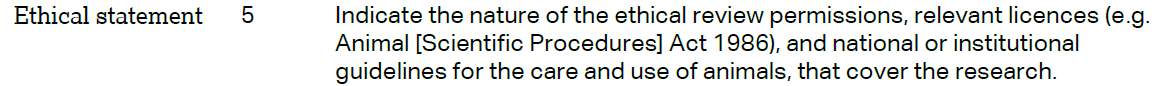 | | | Methods, Page 10/ paragraph 1 |
| 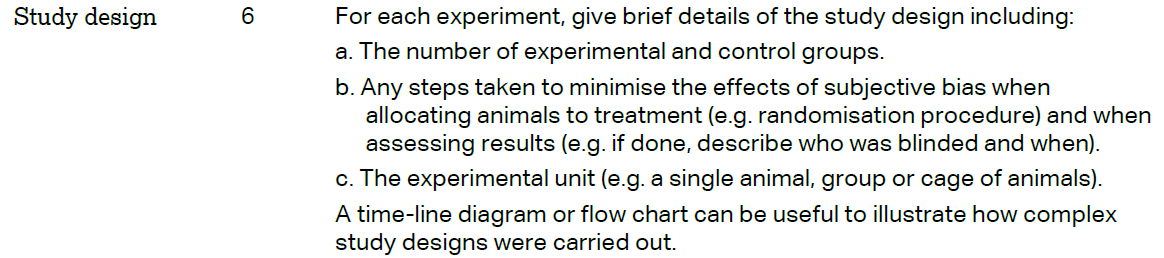 | | | Methods, Page 9/ paragraph 3 |
| 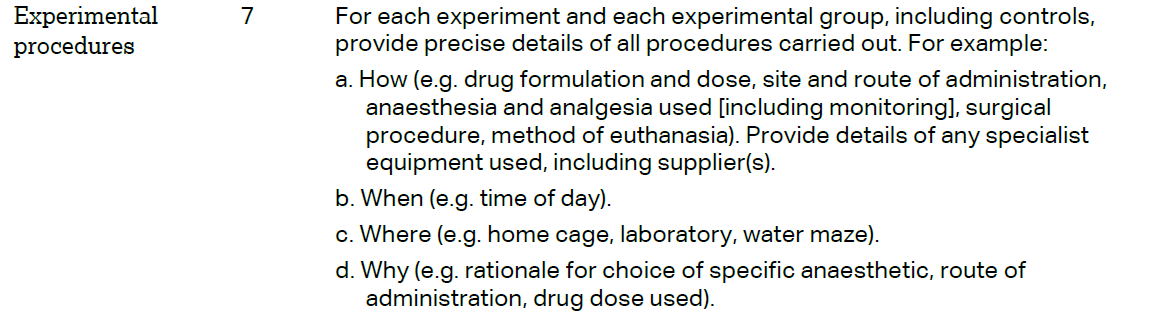 | | | Methods, Page 10/ paragraph 1 |
| 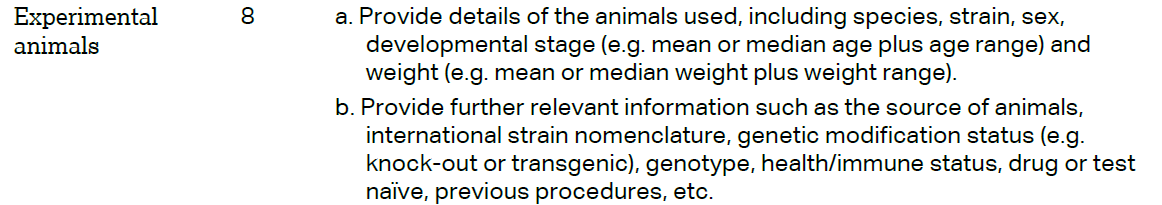 | | | Methods, Page 9/ paragraph 3 |

The ARRIVE guidelines. Originally published in *PLoS Biology*, June 20101

| 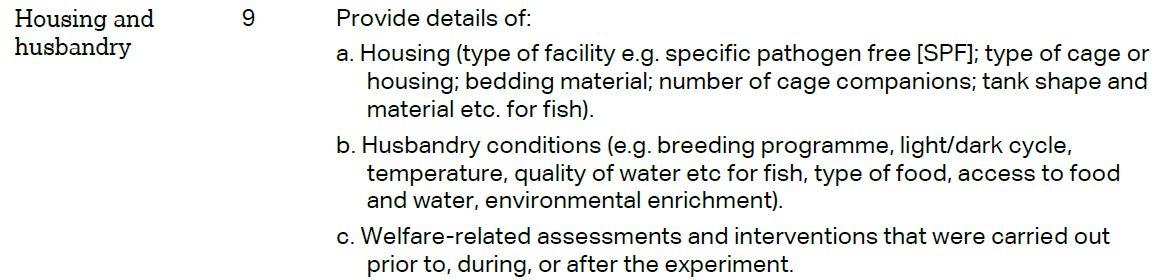 | N/A | |
| --- | --- | --- |
| 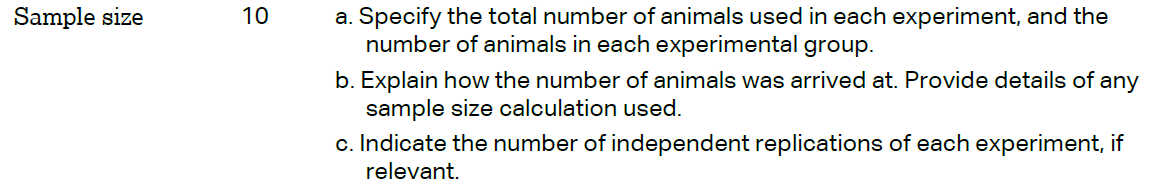 | Methods, Page 9/ paragraph 3 | |
| 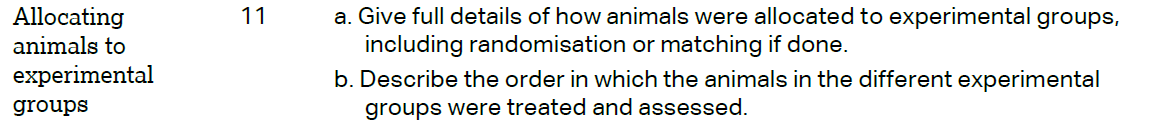 | Methods, Page 10/ paragraph 1 | |
| 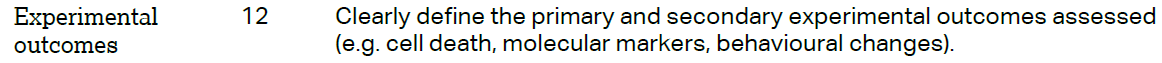 | Results, Page 14/ paragraph 3 | |
| 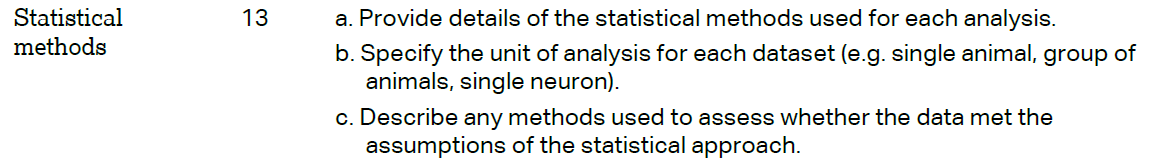 | Methods, Page 10/ paragraph 3 | |
| RESULTS |  | |
| 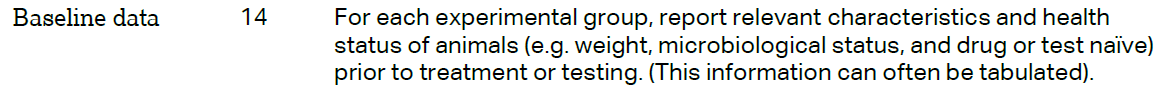 | Results, Page 14/ paragraph 3 | |
| 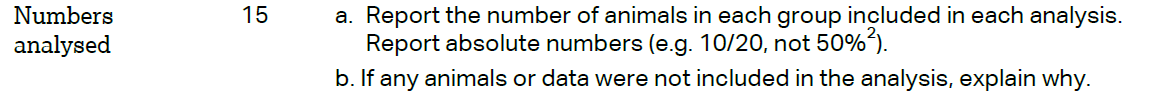 | Results, Page 14/ paragraph 3 | |
| 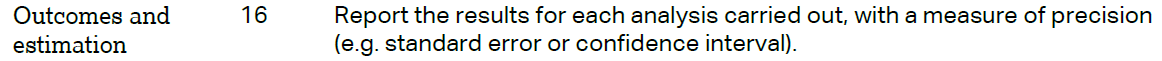 | Results, Page 15/ paragraph 1 | |
| 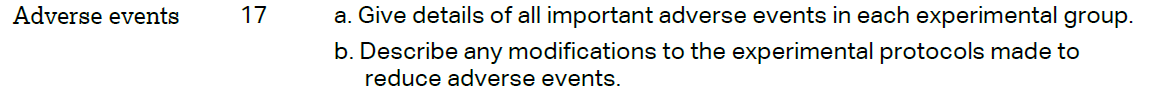 | N/A | |
| DISCUSSION |  | |
| 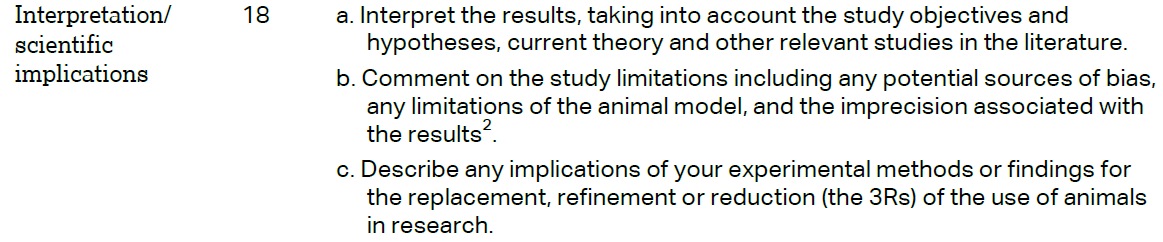 | Discussion, Page 16/ paragraph 2 | |
| 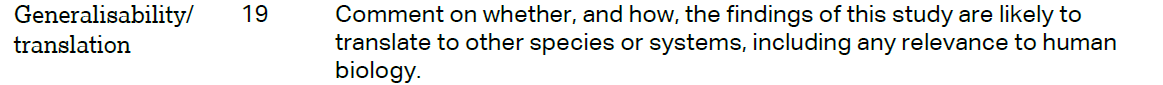 | N/A | |
| 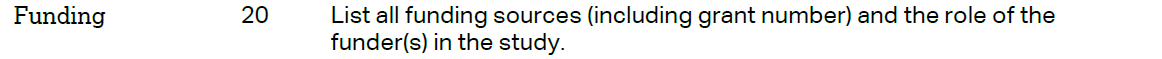 | | Declarations,  Page 20/  paragraph 5 |


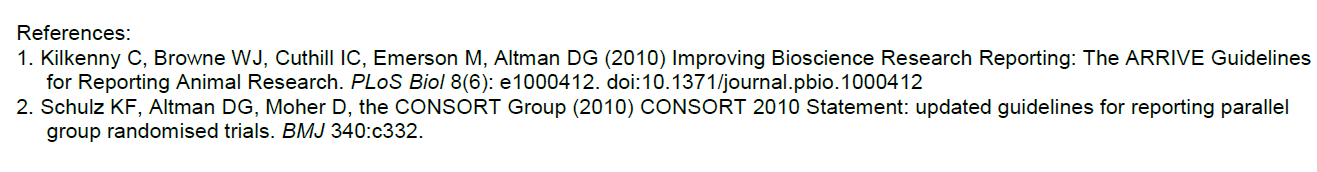

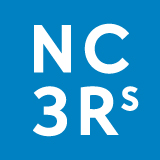

Supplement: Supplementary file 1 [file 903bbd8e02ea5300458c452c.docx]
